# Supplementary material for: The Small GTPase Cdc42 Is a Major Regulator of Neutrophil Effector Functions
Source: PubMed Central journal article supplement (PMC7304460; doi:10.3389/fimmu.2020.01197), 2020-06-12
Supplement: Data_Sheet_1.pdf [file Data_Sheet_1.pdf]

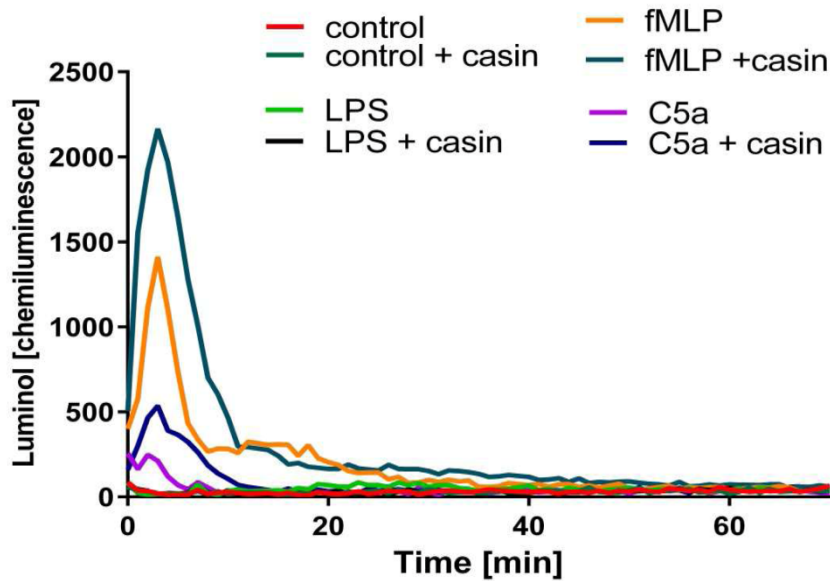

Suppl. Figure 1: Effect of Cdc42 inhibition on ROS production

Primary human neutrophils were incubated with or without 10  $\mu$ M casin. Subsequently, luminol was added and the ROS production of **unstimulated cells** or in response to **100 ng/ml LPS, 10 nM C5a or 1  $\mu$ M fMLP** was measured. The release of H<sub>2</sub>O<sub>2</sub> (lumiol chemiluminescence) was detected for 1 hr at 37 °C. Line graph of one representative experiment showing the luminol chemiluminescence over time.

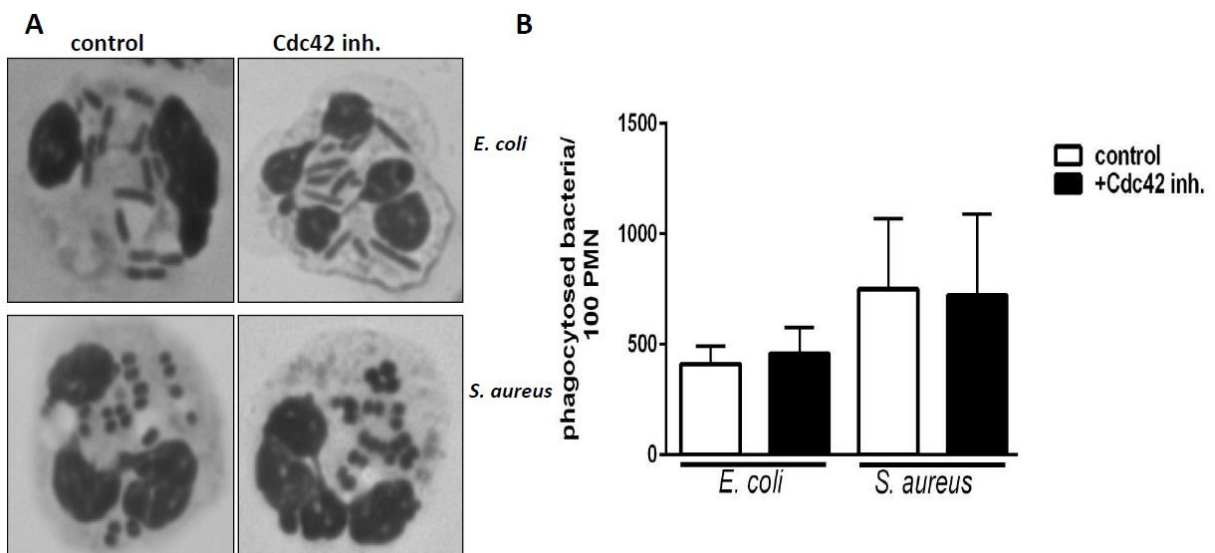

Suppl. Figure 2: Inhibition of Cdc42 does not change the phagocytosis of *E. coli* or *S. aureus* by human neutrophils

Freshly isolated human neutrophils, treated with or without 10  $\mu$ M casin were incubated with *Escherichia coli* or *Staphylococcus aureus* for 30 min at 37 °C and subsequently cytocentrifuged. **(A)** Representative microscopy images of cells showing phagocytosed *E. coli* and *S. aureus*. **(B)** Bar graphs

representing the number of phagocytosed *E. coli* or *S. aureus* by 100 untreated (white bars) or casin treated cells (black bars). Data show mean  $\pm$  SD from four independent experiments.

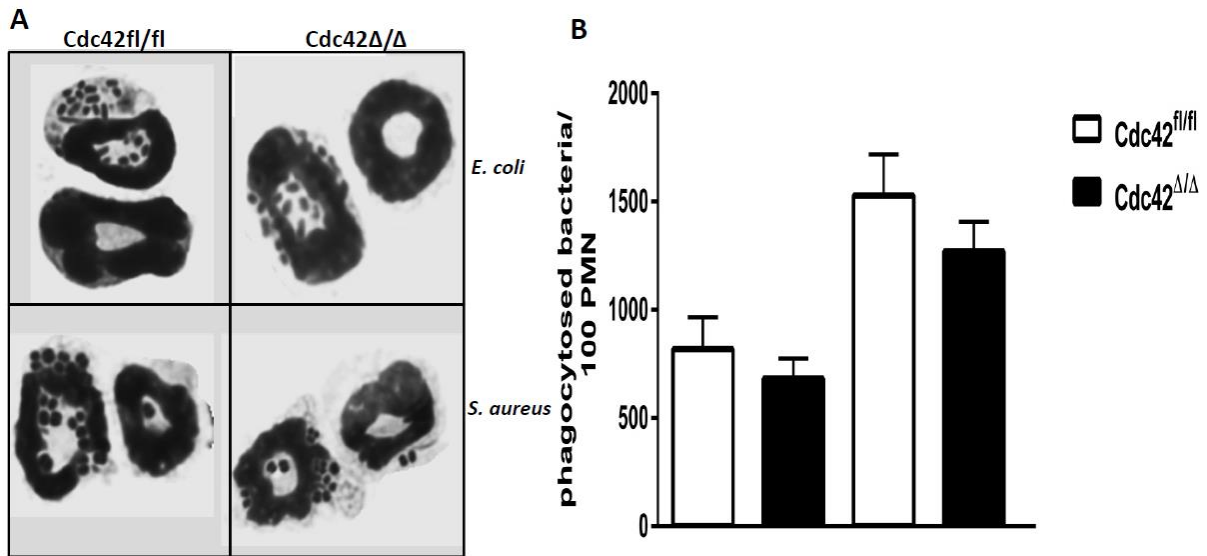

**Suppl. Figure 3: The absence of Cdc42 does not change the phagocytosis of *E. coli* or *S. aureus* by murine neutrophils**

Freshly isolated bone marrow derived murine neutrophils from Cdc42<sup>fl/fl</sup> and Cdc42<sup>Δ/Δ</sup> mice were incubated with *Escherichia coli* or *Staphylococcus aureus* for 30 min at 37 °C and, subsequently, cytocentrifuged. **(A)** Representative microscopy images of Cdc42<sup>fl/fl</sup> and Cdc42<sup>Δ/Δ</sup> cells showing phagocytosed *E. coli* and *S. aureus*. **(B)** Bar graphs represent the number of phagocytosed *E. coli* or *S. aureus* by 100 Cdc42<sup>fl/fl</sup> (white bars) or Cdc42<sup>Δ/Δ</sup> cells (black bars). Data show mean  $\pm$  SD from four independent experiments.
